# Supplementary material for: Mutations in phosphodiesterase 6 identified in familial cases of retinitis pigmentosa
Source: PubMed Central journal article supplement — Hum Genome Var. 2016 Nov 17;3:16036–. doi: 10.1038/hgv.2016.36 (PMC5112436; doi:10.1038/hgv.2016.36), 2016-11-17
Supplement: hgv201636-s1.pdf [file hgv201636-s1.pdf]

## Supplementary information

# Mutations in phosphodiesterase 6 identified in familial cases of retinitis pigmentosa

Inayat Ullah,<sup>1</sup> Firoz Kabir,<sup>2</sup> Clare Brooks S. Gottsch,<sup>2</sup> Muhammad Asif Naeem,<sup>1</sup> Aditya A. Guru,<sup>3</sup> Radha Ayyagari,<sup>3</sup> Shaheen N. Khan,<sup>1</sup> Sheikh Riazuddin,<sup>1,4,5</sup> Javed Akram,<sup>4,5</sup> S. Amer Riazuddin<sup>2,6</sup>

<sup>1</sup>National Centre of Excellence in Molecular Biology, University of the Punjab, Lahore, Pakistan; <sup>2</sup>The Wilmer Eye Institute, Johns Hopkins University School of Medicine, Baltimore, MD, USA; <sup>3</sup>Shiley Eye Institute, University of California San Diego, La Jolla, CA, USA; <sup>4</sup>Allama Iqbal Medical College, University of Health Sciences, Lahore, Pakistan; <sup>5</sup>National Centre for Genetic Diseases, Shaheed Zulfiqar Ali Bhutto Medical University, Islamabad, Pakistan; <sup>6</sup>McKusick-Nathans Institute of Genetic Medicine, Johns Hopkins University School of Medicine, Baltimore, MD, USA.

**Correspondence:** S. Amer Riazuddin (riazuddin@jhmi.edu)

## Supplementary information

# Contents

---

### Supplementary Figures

|                             |   |
|-----------------------------|---|
| Supplementary Figure 1..... | 3 |
| Supplementary Figure 2..... | 4 |
| Supplementary Figure 3..... | 5 |
| Supplementary Figure 4..... | 6 |
| Supplementary Figure 5..... | 7 |

### Supplementary Tables

|                            |    |
|----------------------------|----|
| Supplementary Table 1..... | 8  |
| Supplementary Table 2..... | 9  |
| Supplementary Table 3..... | 10 |
| Supplementary Table 4..... | 11 |
| Supplementary Table 5..... | 12 |
| Supplementary Table 6..... | 13 |

|                        |           |
|------------------------|-----------|
| <b>References.....</b> | <b>15</b> |
|------------------------|-----------|

## Supplementary information

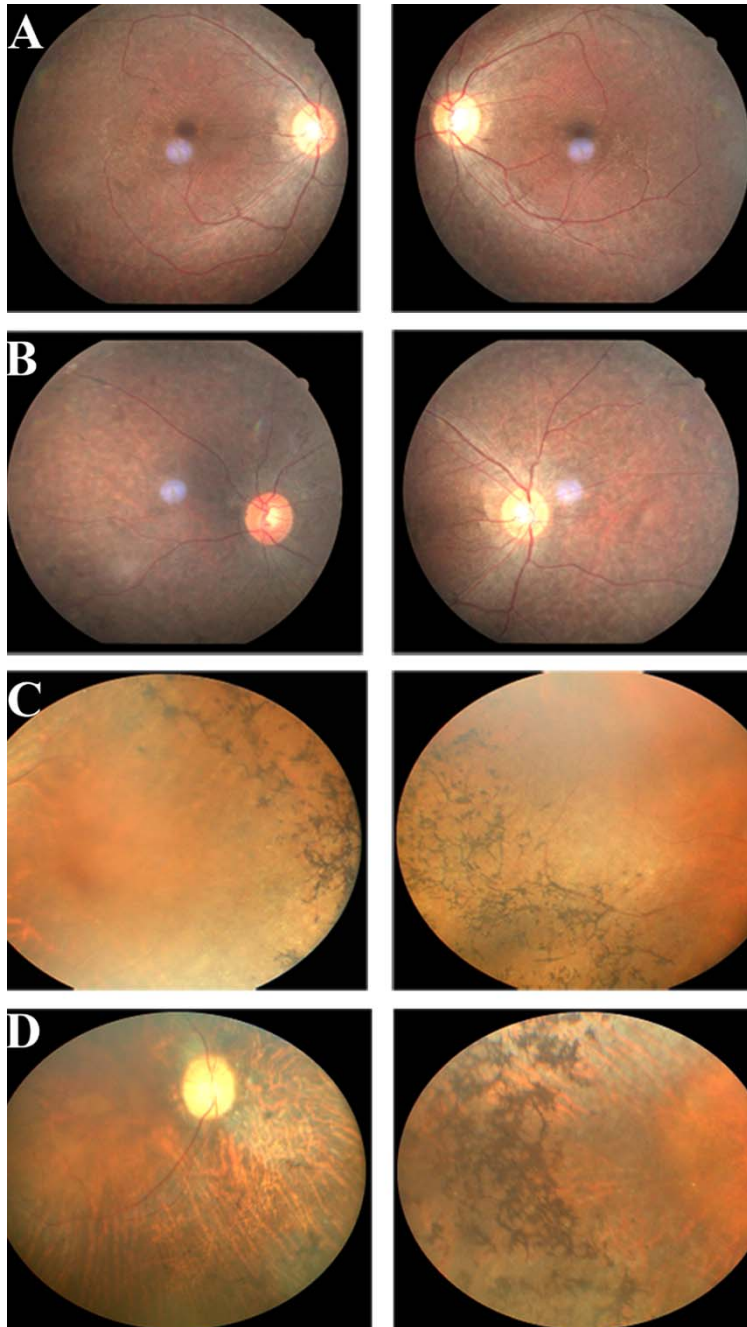

**Supplementary Figure 1:** Fundus photographs of individuals diagnosed with retinitis pigmentosa. OD and OS of **A)** affected individual 17 and **B)** affected individual 18 of the family PKRP345; **C)** affected individual 9 and **D)** affected individual 10 of the family PKRP264. Fundus photographs of affected individuals show the peripheral fundus, which exhibit the characteristic symptoms of RP, including a waxy pallor of the optic disc, attenuated arterioles, and the accumulation of bone-spicule-like deposits. OD: oculus dexter; OS: oculus sinister.

Supplementary information

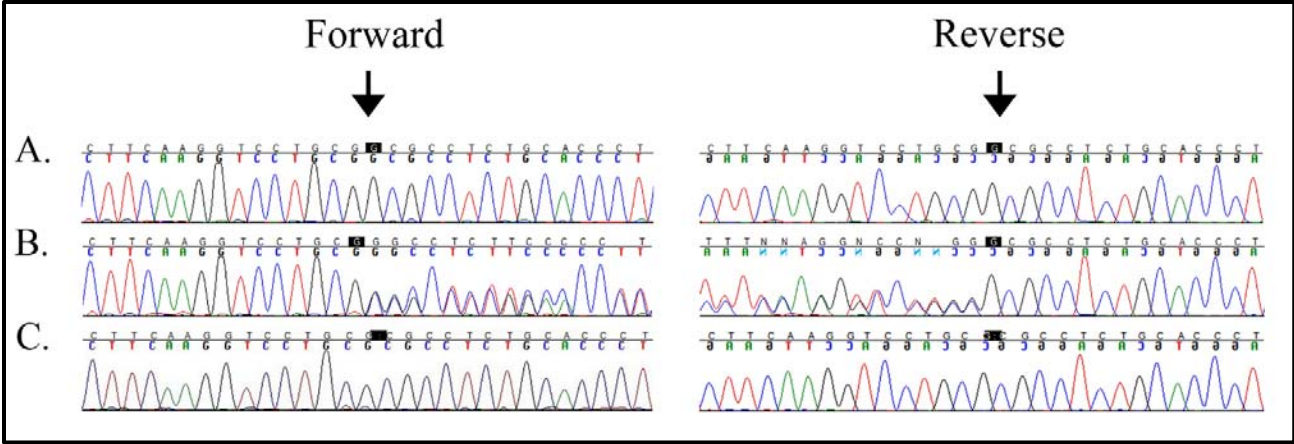

**Supplementary Figure 2:** Sequence chromatograms showing the variation identified in the family PKRP264. Forward and reverse sequence chromatograms of **A)** individual 16 harboring the wild-type allele, and individuals **B)** 14 and **C)** 12 of PKRP264, who are heterozygous and homozygous, respectively, for the single-base-pair deletion, c.243delG (p.R82Afs68\*), in *PDE6B*.

# Supplementary information

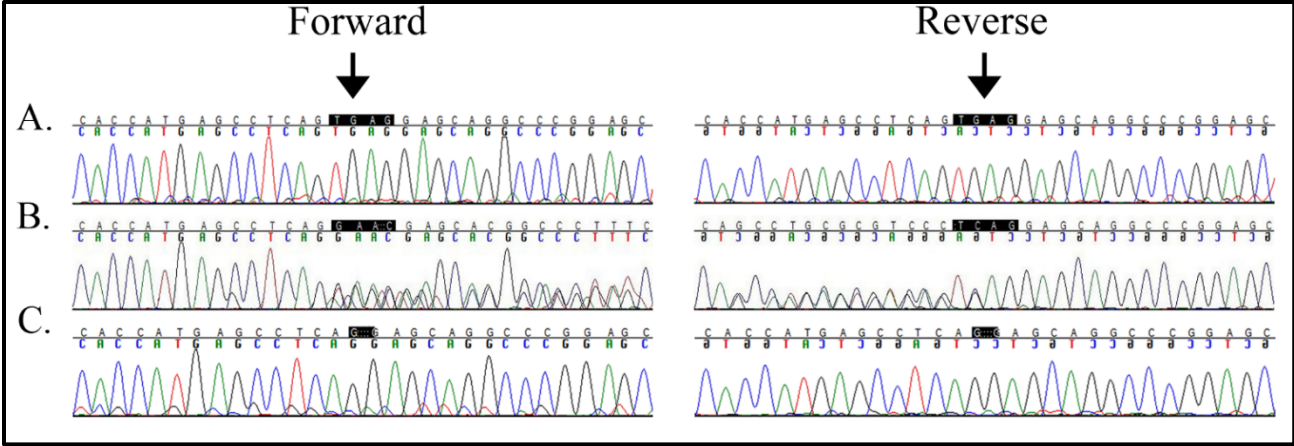

**Supplementary Figure 3:** Sequence chromatograms showing the variation identified in the family PKRP336. Forward and reverse sequence chromatograms of **A)** a normal control harboring the wild-type allele, and individuals **B)** 13 and **C)** 14 of PKRP336, who are heterozygous and homozygous, respectively, for the four-base-pair deletion, c.12\_15delTGAG (p.S4Rfs23\*), in *PDE6B*.

## Supplementary information

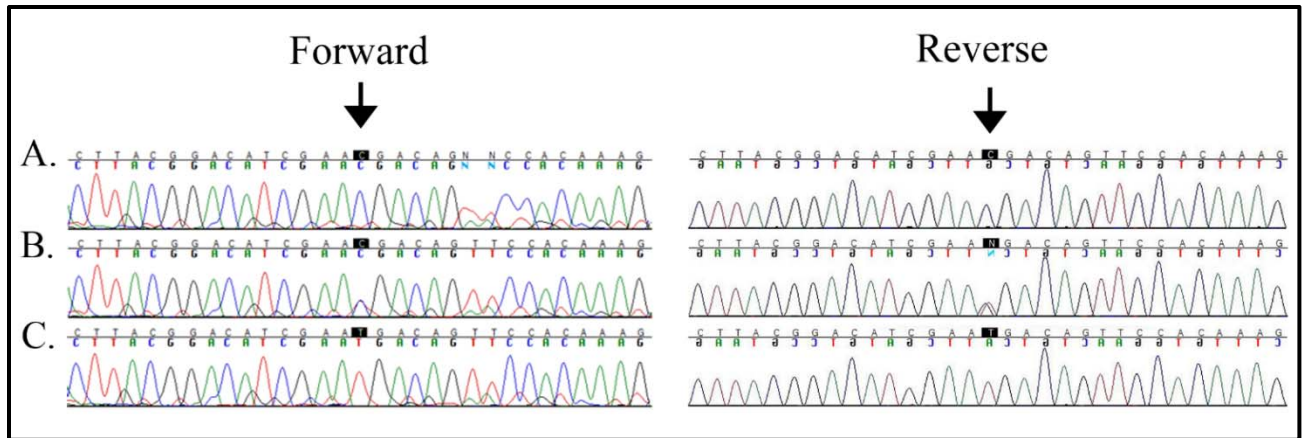

**Supplementary Figure 4:** Sequence chromatograms showing the variation identified in the family PKRP345. Forward and reverse sequence chromatograms of **A)** a normal control harboring the wild-type allele, and individuals **B)** 15 and **C)** 18 of PKRP345, who are heterozygous and homozygous, respectively, for the single-base-pair substitution, c.769C>T (p.R257\*), in *PDE6A*.

# Supplementary information

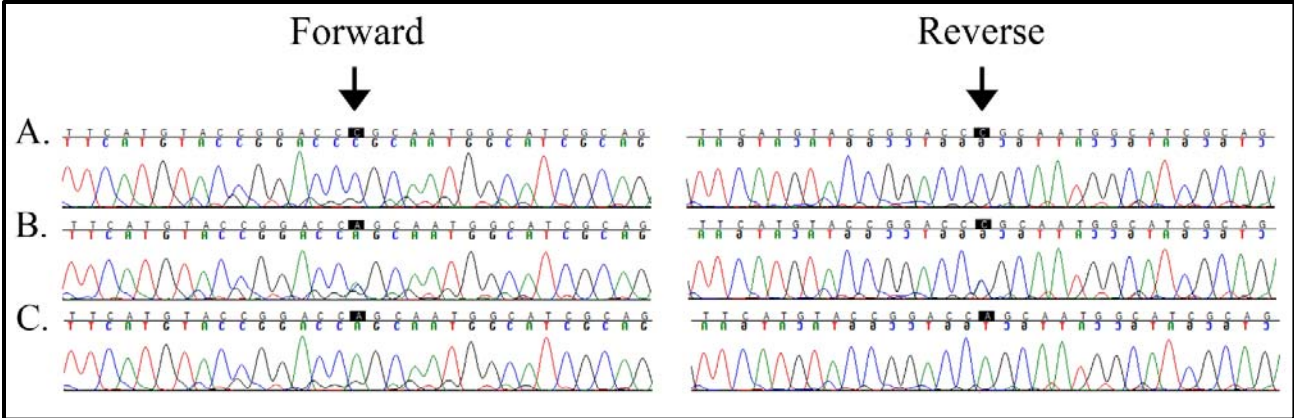

**Supplementary Figure 5:** Sequence chromatograms showing the variation identified in the family PKRP360. Forward and reverse sequence chromatograms of **A)** individual 15 harboring the wild-type allele, and individuals **B)** 12 and **C)** 14 of PKRP360, who are heterozygous and homozygous, respectively, for the single-base-pair substitution, c.304C>A (p.R102S), in *PDE6A*.

## Supplementary information

**Supplementary Table 1:** Clinical characteristics of families linked to *PDE6A* and *PDE6B*.

| Family ID | Individual ID | C-Age (years) | D-Age (years) | Initial Symptom | Night Blindness | Fundus Examination Findings | ERG        |            | Visual Acuity |      |
|-----------|---------------|---------------|---------------|-----------------|-----------------|-----------------------------|------------|------------|---------------|------|
|           |               |               |               |                 |                 |                             | OD         | OS         | OD            | OS   |
| PKRP264   | 9             | 74            | 6             | Night blindness | Progressive     | MD, AA, PD, POD             | NWR<br>NFR | NWR<br>NFR | 6/36          | 6/40 |
|           | 10            | 72            | 6             | Night blindness | Progressive     | MD, AA, PD, POD             | NWR<br>NFR | NWR<br>NFR | 6/24          | 6/28 |
|           | 11            | 62            | 8             | Night blindness | Progressive     | MD, AA, PD, POD             | NWR<br>NFR | NWR<br>NFR | 6/18          | 6/20 |
|           | 12            | 76            | 7             | Night blindness | Progressive     | MD, AA, PD, POD             | NWR<br>NFR | NWR<br>NFR | 6/24          | 6/28 |
| PKRP336   | 14            | 18            | 6             | Night blindness | Progressive     | MD, AA, PD, POD             | NWR<br>NFR | NWR<br>NFR | 6/20          | 6/20 |
|           | 9             | 20            | 7             | Night blindness | Progressive     | MD, AA, PD, POD             | NWR<br>NFR | NWR<br>NFR | 6/25          | 6/25 |
| PKRP345   | 17            | 21            | 5             | Night blindness | Progressive     | MD, AA, PD, POD             | NWR<br>NFR | NWR<br>NFR | 6/20          | 6/20 |
|           | 18            | 26            | 7             | Night blindness | Progressive     | MD, AA, PD, POD             | NWR<br>NFR | NWR<br>NFR | 6/20          | 6/20 |
| PKRP360   | 10            | 34            | 8             | Night blindness | Progressive     | MD, AA, PD, POD             | NWR<br>NFR | NWR<br>NFR | 6/20          | 6/20 |

**Note:** C-Age: current age; D-Age: age at first diagnosis of RP; MD: macular degeneration; AA: attenuated arteries; PD: pigment deposits; POD: pale optic disc; OD: oculus dexter; OS: oculus sinister; NWR: no a- or b-wave response; NFR: no flicker response.



## Supplementary information

**Supplementary Table 2:** Two-point LOD scores of chromosome 4p and 5q markers for the families **A)** PKRP264, **B)** PKRP336, **C)** PKRP345, and **D)** PKRP360.

| Marker   | Mb     | cM     | 0    | 0.01  | 0.05  | 0.1   | 0.2  | 0.3  | Z <sub>max</sub> | Θ <sub>max</sub> |
|----------|--------|--------|------|-------|-------|-------|------|------|------------------|------------------|
| <b>A</b> |        |        |      |       |       |       |      |      |                  |                  |
| D4S3360  | 0.11   | 0.00   | −∞   | -1.86 | -1.03 | -0.47 | 0.12 | 0.25 | 0.25             | 0.30             |
| D4S2936  | 0.69   | 1.48   | 2.04 | 1.98  | 1.75  | 1.44  | 0.80 | 0.14 | 2.04             | 0.00             |
| D4S3038  | 1.10   | 1.48   | 3.10 | 3.04  | 2.81  | 2.49  | 1.84 | 1.19 | 3.10             | 0.00             |
| D4S1614  | 2.64   | 4.74   | −∞   | -1.95 | -1.12 | -0.55 | 0.10 | 0.19 | 0.19             | 0.30             |
| <b>B</b> |        |        |      |       |       |       |      |      |                  |                  |
| D4S3360  | 0.11   | 0.00   | −∞   | -1.86 | -1.03 | -0.47 | 0.12 | 0.25 | 0.25             | 0.30             |
| D4S2936  | 0.69   | 1.48   | 3.04 | 2.98  | 2.75  | 2.44  | 1.80 | 1.14 | 3.04             | 0.00             |
| D4S3038  | 1.10   | 1.48   | 2.88 | 2.82  | 2.59  | 2.28  | 1.64 | .98  | 2.88             | 0.00             |
| D4S1614  | 2.64   | 4.74   | 1.86 | 1.85  | 1.78  | 1.63  | 1.25 | .80  | 1.86             | 0.00             |
| <b>C</b> |        |        |      |       |       |       |      |      |                  |                  |
| D5S812   | 149.62 | 150.34 | 1.25 | 1.19  | 0.99  | 0.72  | 0.38 | 0.16 | 1.25             | 0.00             |
| D5S2015  | 150.19 | 152.62 | 1.79 | 1.73  | 1.50  | 1.20  | 0.57 | 0.09 | 1.79             | 0.00             |
| D5S2013  | 150.20 | 152.62 | 2.02 | 1.97  | 1.77  | 1.51  | 1.00 | 0.51 | 2.02             | 0.00             |
| D5S1469  | 150.07 | 153.16 | 1.21 | 1.16  | 0.95  | 0.68  | 0.33 | 0.11 | 1.21             | 0.00             |
| <b>D</b> |        |        |      |       |       |       |      |      |                  |                  |
| D5S812   | 149.62 | 150.34 | 2.33 | 2.27  | 2.05  | 1.78  | 1.23 | 0.71 | 2.33             | 0.00             |
| D5S2015  | 150.19 | 152.62 | 2.79 | 2.73  | 2.50  | 2.20  | 1.57 | 0.93 | 2.79             | 0.00             |
| D5S2013  | 150.20 | 152.62 | 2.21 | 2.16  | 1.95  | 1.68  | 1.15 | 0.65 | 2.21             | 0.00             |
| D5S1469  | 150.07 | 153.16 | 1.42 | 1.04  | 1.01  | 0.92  | 0.66 | 0.51 | 1.42             | 0.00             |

## Supplementary information

**Supplementary Table 3:** Primer sequences for the amplification of *PDE6A* exons.

| Exon | Forward primer           | Reverse primer       | Annealing temperature (°C) |
|------|--------------------------|----------------------|----------------------------|
| 1a   | CCAGACTGGACTTGTTGCAG     | GAACAGGCTCATGCGGTCT  | 70                         |
| 1b   | TGGAGGAGAGCGAAATCATC     | ACCTGTACCCCAGAACTCCA | 70                         |
| 2    | CCGTTCCACTGTTCTTGCTC     | GCAAAGTTCAGGGGACTTCA | 70                         |
| 3    | GCCAGAGGATGGATTTCTTC     | TAGGCACCTTCATTCCCATC | 70                         |
| 4    | TTGTTGTTATTCTCCAGCTAAGTG | TTGAATGTGTGCCAAGACTC | 70                         |
| 5    | GACTCATGGAGGTGGGACAT     | AGACAACCCAACGCAAAGAC | 70                         |
| 6    | AGATCAAGCCATTGCACTCC     | TTGCCAATTCCAGAATCAC  | 70                         |
| 7    | TGTAAGCAGGTGCTGAGAGC     | TCTTTCTTCCACGTGATCCA | 70                         |
| 8    | CCTTGGACAAGAACATGGTG     | CAGCAGAGTGGGTGGATTCT | 70                         |
| 9    | TATCATCGTTGCCTCTGTGG     | TGTGATAGCGCAGTGACACC | 70                         |
| 10   | GGCAGCACACAGCTTATCAA     | ACAGTGCACAAACCCATGC  | 70                         |
| 11   | GTTGCAAGGACTTTGGAGGA     | ATGCTTTGCAAGGAGAAACC | 70                         |
| 12   | TCTGATCCTTCCAGCAGACC     | CACAGAGGAACAGCGTGTCT | 70                         |
| 13   | GGCCATGCCTTCTTCATATT     | CAACGCTGTTGCTACCATGT | 70                         |
| 14   | CTCCTTACACCCGCCTTTTC     | CCACAAGACTTCCCTGTTGG | 70                         |
| 15   | TCACTTGTGGAGAAGGCTGA     | GCCAATGGGAAGAATGCTC  | 70                         |
| 16   | CCATTGGTAGGTGGGTGACT     | CCTGGGCAACAGAGTGAGAT | 70                         |
| 17   | GCCAATGTTAGCAGCTCAGG     | GCAAGAGCTGTCAGTGCATC | 70                         |
| 18   | GGGTGGAGAAAGGTGAGAGA     | AGTCCAAGCCTCATGACCTG | 70                         |
| 19   | AGCAGGGGTAGGGGATTG       | CTCCATCATGGCGAGGTC   | 70                         |
| 20   | TGCTTCATAGATAGGGTAGGTTTC | CTGGTCACCTGCTAGGGTTT | 70                         |
| 21   | GCTACTCCGAAGCAGCTCAT     | CACACACAGAATGGGGACAG | 70                         |
| 22   | GTCAAAGGGGAAGCCCACT      | GGTCTTCCACTGGCTTGAGT | 70                         |

## Supplementary information

**Supplementary Table 4:** Primer sequences for the amplification of *PDE6B* exons.

| Exon | Forward primer        | Reverse primer       | Annealing temperature (°C) |
|------|-----------------------|----------------------|----------------------------|
| 1A   | CTGGTTTTCTGGAAGGT     | CTGGCGGTACATGAAGAG   | 68                         |
| 1B   | AGGATATGCAGGAGAGCAT   | CTCCTCAGCACAGAACTAGC | 68                         |
| 2    | TCTGCTGGACTGAGCACT    | GCAGGTAAAGAGGTGGATG  | 68                         |
| 3    | GTGCACCTGAGCTTGTGTGT  | ACCTACCCAGGTGAGCACAA | 68                         |
| 4    | CCACAAGCTCAGATGAAACCT | ATCAGCACAGACCACACGTC | 68                         |
| 5    | AAGGAGAAGGTGAGGCTTCC  | CTGGTGGAGACCACAGACAG | 68                         |
| 6    | GGAACACAGACTGGGAAGAC  | AGTGAGTCGGCTTCTGTCTC | 68                         |
| 7–8  | ACACACACGTGCAGCCTA    | AGTGGCAAAAACGAATTCAC | 68                         |
| 9    | AAACTCCAAATGCAGAGAGG  | TGCTTCTGTGTGGGGTCT   | 68                         |
| 10   | AGACCCACACAGAAGCACT   | CTGTGACCCCTCAATGGAC  | 68                         |
| 11   | ACGGTCATTTGTCTCCAGAT  | AGTCAGGCCCACTAAACATC | 68                         |
| 12   | AACTGGGCAAGTTCTTCACT  | TACTTCCCCTGTGCATTTTA | 68                         |
| 13   | GAAGTCCAGGAGACGGTGT   | AGGGGTTGGGATGACCTA   | 68                         |
| 14   | TACCAAGGGCAGCACTCA    | CGCCACCATACACAGCTT   | 68                         |
| 15   | CAGGAGGTCAAGGCTGTATT  | CACTGAGTGTCCAGGTCCTT | 68                         |
| 16   | CCAAGGACCTGGACACTCA   | GTGGGAGCAAGTGTGGAGA  | 68                         |
| 17   | CCTGGCCCTGTACTTCAA    | CAAGGGCTACAGACCAATG  | 68                         |
| 18   | GAGGCTGAGGCACAAGAATC  | ACTGCAGTACCCCATCCTT  | 68                         |
| 19   | GGCAACGGACCATTGTTT    | TGAGATAAGGACCCACGAC  | 68                         |
| 20   | TCCATGAGCACATCTGAGTGA | TCCGAAACTGATGTTCTC   | 68                         |
| 21   | CGAGGTTTCTCCCTCACAG   | TGGCTCTGCTTTTCTCATT  | 68                         |
| 22   | TGAGCATAATCAGGGCACAG  | TTGGGCTTCCTAACCTCTTG | 68                         |

## Supplementary information

**Supplementary Table 5:** Causal mutations reported in *PDE6A*-associated retinal dystrophies.

| No. | Nucleotide change | Amino Acid Change          | Inheritance | Reference |
|-----|-------------------|----------------------------|-------------|-----------|
| 1   | c.205C>T          | p.Gln69*                   | arRP        | 1         |
| 2   | c.298C>T          | p.Arg100Trp                | arRP        | 2         |
| 3   | c.304C>A          | p.Arg102Ser                | arRP        | 3         |
| 4   | c.304C>T          | p.Arg102Cys                | arRP        | 4         |
| 5   | c.305G>A          | p.Arg102His                | arRP        | 3         |
| 6   | c.889C>T          | p.Arg256*                  | arRP        | 5*        |
| 7   | c.769C>T          | p.Arg257*                  | arRP        | 6         |
| 8   | c.784G>A          | p.Ala262Thr                | arRP        | 2         |
| 9   | c.878C>T          | p.Pro293Leu                | arRP        | 3         |
| 10  | c.908C>G          | p.Ser303Cys                | arRP        | 4         |
| 11  | c.923C>T          | p.Pro308Leu                | arRP        | 2         |
| 12  | c.937del          | p.Ile313fs                 | arRP        | 7         |
| 13  | c.1032C>A         | p.Ser344Arg                | arRP        | 8         |
| 14  | c.1166C>T         | p.Pro389Leu                | arRP        | 9         |
| 15  | c.1171G>A         | p.Val391Met                | arRP        | 3         |
| 16  | c.1363A>T         | p.Lys455Ter                | adRP        | 1         |
| 17  | c.1630C>T         | p.Arg544Trp                | arRP        | 10        |
| 18  | c.1675C>A         | p.Tyr558*                  | arRP        | 11        |
| 19  | c.1681G>A         | p.Trp561Ter                | arRP        | 8         |
| 20  | c.1684C>T         | p.R562W                    | arRP        | 12        |
| 21  | c.1705C>A         | p.Gln569Lys                | arRP        | 3         |
| 22  | c.1717T>C         | p.Ser573Pro                | arRP        | 3         |
| 23  | c.1749C>G         | p.Tyr583Ter                | arRP        | 8         |
| 24  | c.1960C>T         | p.Gln654Term               | arRP        | 13        |
| 25  | c.1963C>T         | p.His655Tyr                | arRP        | 14        |
| 26  | c.2053G>A         | p.Val685Met                | arRP        | 15        |
| 27  | c.2333A>T         | p.Asp778Val                | adRP        | 1         |
| 28  | c.2218-2219insT   | p.Y700fs*714               | arRP        | 5*        |
| 29  | IVS6+1G→A         | splicing effect            | arRP        | 3         |
| 30  | c.1408-2A>G       | p.K470_L491del             | arRP        | 5*, 16*   |
| 31  | c.933+4C>T        | splice effect              | arRP        | 17        |
| 32  | c.2028-1G>A       | p.K677Rfs24*               | arRP        | 16*       |
| 33  | c.676delC         | p.H226TfsX2 (heterozygous) | sporadic    | 18        |
| 34  | c.1268delT        | p.L423*                    | arRP        | 19        |
| 35  | c.1336delA        | p.R446Gfs8*                | arRP        | 20        |

**Note:** All mutations are listed in the format of the original publication. Asterisks (\*) indicate mutations previously identified by the authors. arRP: autosomal recessive retinitis pigmentosa; adRP: autosomal dominant retinitis pigmentosa.

## Supplementary information

**Supplementary Table 6:** Causal mutations reported in *PDE6B*-associated retinal dystrophies.

| No. | Nucleotide change    | Amino Acid Change    | Inheritance  | Reference |
|-----|----------------------|----------------------|--------------|-----------|
| 1   | c.163G>T             | p.Glu55*             | arRP         | 21        |
| 2   | c.299G>A             | p.Arg100His          | arRP, adRP   | 22        |
| 3   | c.313G>A             | p.Glu105Lys          | arRP         | 23        |
| 4   | c.496G>A             | p.Glu166Lys          | arRP         | 22        |
| 5   | c.610G>T             | p.E204*              | arRP         | 23        |
| 6   | c.669T>A             | p.Y223*              | arRP         | 2         |
| 7   | c.703C>T             | p.Arg235Cys          | arRP         | 2         |
| 8   | c.774C>A             | p.His258Asp          | arRP, adCSNB | 24        |
| 9   | c.801C>A             | p.Tyr267*            | arRP         | 22        |
| 10  | c.810C>A             | p.Cys270*            | arRP, adRP   | 25        |
| 11  | c.892C>T             | p.Gln298*            | arRP, adRP   | 26        |
| 12  | c.922G>A             | p.Gly308Ser          | arRP, adRP   | 27        |
| 13  | c.1010A>G            | p.His337Arg          | arRP         | 28        |
| 14  | c.1043_1044insCG     | p.Ala349fs           | arRP, adRP   | 22        |
| 15  | c.1133G>A            | p.Trp378Term         | arRP         | 23        |
| 16  | c.1160C>T            | p.Pro387Leu          | arRP         | 29*       |
| 17  | c.1189G>A            | p.Gly397Arg          | arRP         | 30        |
| 18  | c.1219G>A            | p.Gly407Arg          | arRP         | 31        |
| 19  | c.1237C>T            | p.Gln413*            | arRP         | 32        |
| 20  | c.1317C>G            | p.Asn439Lys          | arRP         | 18        |
| 21  | c.1547T>C            | p.Leu516Pro          | arRP, adRP   | 33        |
| 22  | c.1568T>G            | p.Met523Arg          | arRP         | 6         |
| 23  | c.18075T>C           | p.Leu527Pro          | arRP, adRP   | 34        |
| 24  | c.1591C>T            | p.Arg531X            | arRP, adRP   | 26        |
| 25  | c.1604T>A            | p.Ile535Asn          | arRP, adRP   | 35        |
| 26  | c.1655G>A            | p.Arg552Gln          | arRP         | 29*, 36   |
| 27  | c.1624C>T            | p.Arg542Trp          | arRP         | 32        |
| 28  | c.1500T>C            | p.Tyr557His          | arRP, adRP   | 34        |
| 29  | c.1678C>T            | p.Arg560Cys          | arRP         | 37        |
| 30  | c.1685G>A            | p.Gly562Asp          | arRP, adRP   | 33        |
| 31  | c.1699C>T            | p.Q567*              | arRP         | 2         |
| 32  | c.1712C>T            | p.Thr571Met          | arRP         | 31        |
| 33  | c.1727G>A            | p.Gly576Asp          | arRP, adRP   | 25        |
| 34  | c.1798 G>A           | p.Asp600Asn          | arRP, adRP   | 4         |
| 35  | c.1811C>T            | p.Thr604Ile          | arRP         | 27        |
| 36  | c.1859A>G            | p.His620Arg          | arRP         | 38        |
| 37  | c.1895T > C          | p.Phe632Ser          | arRP         | 39        |
| 38  | c.2047G>A            | p.Val683Met          | arRP         | 2         |
| 39  | c.2012T>C            | p.Leu671Pro          | arRP         | 27        |
| 40  | c.2096T>G            | p.Leu699Arg          | arRP         | 36        |
| 41  | c.2093_2094insCCTGT  | p.Leu701Cysfs*14     | arRP         | 40        |
| 42  | c.2188A>             | p.Lys706X            | arRP, adRP   | 26        |
| 43  | c.2249T>G            | p.Val750Gly          | arRP         | 2         |
| 44  | c.2326G>A            | p.Asp776Asn          | arRP, adRP   | 22        |
| 45  | c.2399T>C            | p.Leu800Pro          | arRP         | 32        |
| 46  | c.2399del            | p.Leu800ArgfsX17     | arRP         | 9         |
| 47  | c.2419T>A            | p.Trp807Arg          | arRP         | 41        |
| 48  | c.1923_1969ins6del47 | p.T641TfsX31         | arRP         | 42        |
| 49  | c.1927_1969delinsGG  | p.N643fs             | arRP         | 22        |
| 50  | IVS2 as -1 G>T       | agG-atG splice error | arRP         | 25        |
| 51  | IVS8 ds +3 A>G       | splicing             | arRP         | 22        |
| 52  | c.1722+1G>A          | splicing             | arRP         | 43        |
| 53  | IVS15 ds +2 T>C      | splicing             | arRP         | 22        |
| 54  | IVS18 ds +1 G>A      | splicing             | arRP         | 34        |
| 55  | Pro-496 (1-bp del)   | splicing             | arRP         | 26        |
| 56  | duplication of 71 b  | splicing             | arRP         | 44        |
| 57  | c.1107+3A>G          | splicing             | arRP         | 22        |
| 58  | c.1920+2T>C          | splicing             | arRP         | 22        |

## Supplementary information

|    |                   |                 |      |    |
|----|-------------------|-----------------|------|----|
| 59 | c.2503+5G>C       | splicing        | arRP | 22 |
| 60 | c.2503+2T>C       | splicing        | arRP | 7  |
| 61 | c.1615-1G>C       | IVS12 as G-C -1 | arRP | 23 |
| 62 | c.1060-1G>T       | IVS7 as G-T -1  | arRP | 45 |
| 63 | c.1467+1G>C       | IVS11 ds G-C +1 | arRP | 46 |
| 64 | c.1401+4_1401+48d | splicing        | arRP | 7  |

**Note:** All mutations are listed in the format of the original publication. Asterisks (\*) indicate mutations previously identified by the authors. arRP: autosomal recessive retinitis pigmentosa; adRP: autosomal dominant retinitis pigmentosa; adCSNB: autosomal dominant congenital stationary night blindness.

# Supplementary information

## References

1. Wang X, Wang H, Sun V, Tuan HF, Keser V, Wang K, et al. Comprehensive molecular diagnosis of 179 Leber congenital amaurosis and juvenile retinitis pigmentosa patients by targeted next generation sequencing. *J Med Genet.* 2013;50:674-688.
2. Eisenberger T, Neuhaus C, Khan AO, Decker C, Preising MN, Friedburg C, et al. Increasing the yield in targeted next-generation sequencing by implicating CNV analysis, non-coding exons and the overall variant load: the example of retinal dystrophies. *PLoS One.* 2013;8:e78496.
3. Dryja TP, Rucinski DE, Chen SH, Berson EL. Frequency of mutations in the gene encoding the alpha subunit of rod cGMP-phosphodiesterase in autosomal recessive retinitis pigmentosa. *Invest Ophthalmol Vis Sci.* 1999;40:1859-1865.
4. Tsang SH, Tsui I, Chou CL, Zernant J, Haamer E, Iranmanesh R, et al. A novel mutation and phenotypes in phosphodiesterase 6 deficiency. *Am J Ophthalmol.* 2008;146:780-788.
5. Riazuddin SA, Zulfiqar F, Zhang Q, Yao W, Li S, Jiao X, et al. Mutations in the gene encoding the alpha-subunit of rod phosphodiesterase in consanguineous Pakistani families. *Mol Vis.* 2006;12:1283-1291.
6. Bocquet B, Marzouka NA, Hebrard M, Manes G, Senechal A, Meunier I, et al. Homozygosity mapping in autosomal recessive retinitis pigmentosa families detects novel mutations. *Mol Vis.* 2013;19:2487-2500.
7. van Huet RA, Pierrache LH, Meester-Smoor MA, Klaver CC, van den Born LI, Hoyng CB, et al. The efficacy of microarray screening for autosomal recessive retinitis pigmentosa in routine clinical practice. *Mol Vis.* 2015;21:461-476.
8. Huang SH, Pittler SJ, Huang X, Oliveira L, Berson EL, Dryja TP. Autosomal recessive retinitis pigmentosa caused by mutations in the alpha subunit of rod cGMP phosphodiesterase. *Nat Genet.* 1995;11:468-471.
9. Collin RW, Safieh C, Littink KW, Shalev SA, Garzosi HJ, Rizel L, et al. Mutations in C2ORF71 cause autosomal-recessive retinitis pigmentosa. *Am J Hum Genet.* 2010;86:783-788.
10. Khan MI, Kersten FF, Azam M, Collin RW, Hussain A, Shah ST, et al. CLRN1 mutations cause nonsyndromic retinitis pigmentosa. *Ophthalmology.* 2011;118:1444-1448.
11. Siemiatkowska AM, Arimadyo K, Moruz LM, Astuti GD, de Castro-Miro M, Zonneveld MN, et al. Molecular genetic analysis of retinitis pigmentosa in Indonesia using genome-wide homozygosity mapping. *Mol Vis.* 2011;17:3013-3024.
12. Sothilingam V, Garcia GM, Jiao K, Buena-Atienza E, Sahaboglu A, Trifunovic D, et al. Retinitis pigmentosa: impact of different Pde6a point mutations on the disease phenotype. *Hum Mol Genet.* 2015;24:5486-5499.
13. Sharon D, Banin E. Nonsyndromic retinitis pigmentosa is highly prevalent in the Jerusalem region with a high frequency of founder mutations. *Mol Vis.* 2015;21:783-792.
14. Simpson DA, Clark GR, Alexander S, Silvestri G, Willoughby CE. Molecular diagnosis for heterogeneous genetic diseases with targeted high-throughput DNA sequencing applied to retinitis pigmentosa. *J Med Genet.* 2011;48:145-151.
15. Corton M, Blanco MJ, Torres M, Sanchez-Salorio M, Carracedo A, Brion M. Identification of a novel mutation in the human PDE6A gene in autosomal recessive retinitis pigmentosa: homology with the nmf28/nmf28 mice model. *Clin Genet.* 2010;78:495-498.
16. Khan SY, Ali S, Naeem MA, Khan SN, Husnain T, Butt NH, et al. Splice-site mutations identified in PDE6A responsible for retinitis pigmentosa in consanguineous Pakistani families. *Mol Vis.* 2015;21:871-882.

## Supplementary information

17. Anasagasti A, Barandika O, Irigoyen C, Benitez BA, Cooper B, Cruchaga C, et al. Genetic high throughput screening in Retinitis Pigmentosa based on high resolution melting (HRM) analysis. *Exp Eye Res.* 2013;116:386-394.
18. Glockle N, Kohl S, Mohr J, Scheurenbrand T, Sprecher A, Weisschuh N, et al. Panel-based next generation sequencing as a reliable and efficient technique to detect mutations in unselected patients with retinal dystrophies. *Eur J Hum Genet.* 2014;22:99-104.
19. Yang L, Cui H, Yin X, Dou H, Zhao L, Chen N, et al. Dependable and Efficient Clinical Molecular Diagnosis of Chinese RP Patient with Targeted Exon Sequencing. *PLoS One.* 2015;10:e0140684.
20. Consugar MB, Navarro-Gomez D, Place EM, Bujakowska KM, Sousa ME, Fonseca-Kelly ZD, et al. Panel-based genetic diagnostic testing for inherited eye diseases is highly accurate and reproducible, and more sensitive for variant detection, than exome sequencing. *Genet Med.* 2015;17:253-261.
21. Shanks ME, Downes SM, Copley RR, Lise S, Broxholme J, Hudspith KA, et al. Next-generation sequencing (NGS) as a diagnostic tool for retinal degeneration reveals a much higher detection rate in early-onset disease. *Eur J Hum Genet.* 2013;21:274-280.
22. Neveling K, Collin RW, Gilissen C, van Huet RA, Visser L, Kwint MP, et al. Next-generation genetic testing for retinitis pigmentosa. *Hum Mutat.* 2012;33:963-972.
23. Xu Y, Guan L, Shen T, Zhang J, Xiao X, Jiang H, et al. Mutations of 60 known causative genes in 157 families with retinitis pigmentosa based on exome sequencing. *Hum Genet.* 2014;133:1255-1271.
24. Gal A, Orth U, Baehr W, Schwinger E, Rosenberg T. Heterozygous missense mutation in the rod cGMP phosphodiesterase beta-subunit gene in autosomal dominant stationary night blindness. *Nat Genet.* 1994;7:551.
25. Danciger M, Heilbron V, Gao YQ, Zhao DY, Jacobson SG, Farber DB. A homozygous PDE6B mutation in a family with autosomal recessive retinitis pigmentosa. *Mol Vis.* 1996;2:10.
26. McLaughlin ME, Sandberg MA, Berson EL, Dryja TP. Recessive mutations in the gene encoding the beta-subunit of rod phosphodiesterase in patients with retinitis pigmentosa. *Nat Genet.* 1993;4:130-134.
27. Jin ZB, Mandai M, Yokota T, Higuchi K, Ohmori K, Ohtsuki F, et al. Identifying pathogenic genetic background of simplex or multiplex retinitis pigmentosa patients: a large scale mutation screening study. *J Med Genet.* 2008;45:465-472.
28. Schorderet DF, Iouranova A, Favez T, Tiab L, Escher P. IROme, a new high-throughput molecular tool for the diagnosis of inherited retinal dystrophies. *Biomed Res Int.* 2013;2013:198089.
29. Ali S, Riazuddin SA, Shahzadi A, Nasir IA, Khan SN, Husnain T, et al. Mutations in the beta-subunit of rod phosphodiesterase identified in consanguineous Pakistani families with autosomal recessive retinitis pigmentosa. *Mol Vis.* 2011;17:1373-1380.
30. van der Smagt JJ, Vink A, Kirkels JH, Nelen M, ter HH, Molenschot MM, et al. Congenital posterior pole cataract and adult onset dilating cardiomyopathy: expanding the phenotype of alphaB-crystallinopathies. *Clin Genet.* 2014;85:381-385.
31. Huang XF, Huang F, Wu KC, Wu J, Chen J, Pang CP, et al. Genotype-phenotype correlation and mutation spectrum in a large cohort of patients with inherited retinal dystrophy revealed by next-generation sequencing. *Genet Med.* 2015;17:271-278.
32. Wang F, Wang H, Tuan HF, Nguyen DH, Sun V, Keser V, et al. Next generation sequencing-based molecular diagnosis of retinitis pigmentosa: identification of a novel genotype-phenotype correlation and clinical refinements. *Hum Genet.* 2014;133:331-345.



## Supplementary information

33. Clark GR, Crowe P, Muszynska D, O'Prey D, O'Neill J, Alexander S, et al. Development of a diagnostic genetic test for simplex and autosomal recessive retinitis pigmentosa. *Ophthalmology*. 2010;117:2169-2177.
34. McLaughlin ME, Ehrhart TL, Berson EL, Dryja TP. Mutation spectrum of the gene encoding the beta subunit of rod phosphodiesterase among patients with autosomal recessive retinitis pigmentosa. *Proc Natl Acad Sci U S A*. 1995;92:3249-3253.
35. Saga M, Mashima Y, Akeo K, Kudoh J, Oguchi Y, Shimizu N. A novel homozygous Ile535Asn mutation in the rod cGMP phosphodiesterase beta-subunit gene in two brothers of a Japanese family with autosomal recessive retinitis pigmentosa. *Curr Eye Res*. 1998;17:332-335.
36. Valverde D, Baiget M, Seminago R, del RE, Garcia-Sandoval B, del RT, et al. Identification of a novel R552O mutation in exon 13 of the beta-subunit of rod phosphodiesterase gene in a Spanish family with autosomal recessive retinitis pigmentosa. VALVERDE1996. *Hum Mutat*. 1996;8:393-394.
37. Pozo MG, Bravo-Gil N, Mendez-Vidal C, Montero-de-Espinosa I, Millan JM, Dopazo J, et al. Re-evaluation casts doubt on the pathogenicity of homozygous USH2A p.C759F. *Am J Med Genet A*. 2015;167:1597-1600.
38. Neveling K, Feenstra I, Gilissen C, Hoefsloot LH, Kamsteeg EJ, Mensenkamp AR, et al. A post-hoc comparison of the utility of sanger sequencing and exome sequencing for the diagnosis of heterogeneous diseases. *Hum Mutat*. 2013;34:1721-1726.
39. Zhao L, Wang F, Wang H, Li Y, Alexander S, Wang K, et al. Next-generation sequencing-based molecular diagnosis of 82 retinitis pigmentosa probands from Northern Ireland. *Hum Genet*. 2015;134:217-230.
40. Ge Z, Bowles K, Goetz K, Scholl HP, Wang F, Wang X, et al. NGS-based Molecular diagnosis of 105 eyeGENE((R)) probands with Retinitis Pigmentosa. *Sci Rep*. 2015;5:18287.
41. Hmani-Aifa M, Benzina Z, Zulfiqar F, Dhouib H, Shahzadi A, Ghorbel A, et al. Identification of two new mutations in the GPR98 and the PDE6B genes segregating in a Tunisian family. *Eur J Hum Genet*. 2009;17:474-482.
42. Shen S, Sujirakul T, Tsang SH. Next-generation sequencing revealed a novel mutation in the gene encoding the beta subunit of rod phosphodiesterase. *Ophthalmic Genet*. 2014;35:142-150.
43. Azam M, Collin RW, Malik A, Khan MI, Shah ST, Shah AA, et al. Identification of novel mutations in Pakistani families with autosomal recessive retinitis pigmentosa. *Arch Ophthalmol*. 2011;129:1377-1378.
44. Bayes M, Giordano M, Balcells S, Grinberg D, Vilageliu L, Martinez I, et al. Homozygous tandem duplication within the gene encoding the beta-subunit of rod phosphodiesterase as a cause for autosomal recessive retinitis pigmentosa. *Hum Mutat*. 1995;5:228-234.
45. Beheshtian M, Saeed RS, Babanejad M, Mohseni M, Hashemi H, Eshghabadi A, et al. Impact of whole exome sequencing among Iranian patients with autosomal recessive retinitis pigmentosa. *Arch Iran Med*. 2015;18:776-785.
46. Fu Q, Wang F, Wang H, Xu F, Zaneveld JE, Ren H, et al. Next-generation sequencing-based molecular diagnosis of a Chinese patient cohort with autosomal recessive retinitis pigmentosa. *Invest Ophthalmol Vis Sci*. 2013;54:4158-4166.
